# Supplementary material for: The B Chromosomes of Prochilodus lineatus (Teleostei, Characiformes) Are Highly Enriched in Satellite DNAs
Source: MDPI journal article supplement (doi:10.3390/cells10061527), 2021-06-17
Supplement: s1 [file s1]

**Table S1.** Designed primers in the present study. Primers highlighted in red did not amplify.

| satDNA family    | Primer F                  | Primer R                 |
|------------------|---------------------------|--------------------------|
| PliSat01         | TGTTTCTAAGCAATAGAAAGTTA   | GTCACAAAACAAGTTTCATTAC   |
| PliSat02         | GGAAGGTCCTAGAGTTACCA      | GTACGATTGGTTTTTCCCC      |
| PliSat03 (SATH1) | GCTGCAGCAAAAACCCTACC      | AGTGGGAGCTAGGGTTAGGG     |
| PliSat04         | GGCTCAGGGAAAACCACAAA      | GGTCCAGGAGGAGTTTATAGG    |
| PliSat05         | GAAGAACCACCCAAAAACGC      | GGGAAAATGCGTGCACATGA     |
| PliSat08         | GTAAGTAGTGTGTTGGTGTA      | CACATTACACTTACTGAGTT     |
| PliSat09         | GATCGTTCCATTTCCCATGC      | CGAGAGCTCTGCTATACTCC     |
| PliSat11         | ATGCGATCGGTATTTATTCGGG    | CACGTCACGTTTAGAGCGGG     |
| PliSat12         | ACTCACTGGCCACTTTATTAG     | GAAGCACAAGGTGGGTGTTT     |
| PliSat13         | AAATACAATAGGGTCCCTGCA     | GGTCTTAAAATACTCTGTGGA    |
| PliSat14         | GTGAAAGGTGACGTTGCTGCGT    | CTTTCACCTTCGGCATTTCATC   |
| PliSat15         | CCTAATGAGAACTGTAGAACAG    | GACTCTAAATGTAGGTATTGTGA  |
| PliSat16         | ATACTGGATTAAAATCACTCCACAA | GTGTGTGTAGTTTTTACAGTCTGA |
| PliSat18         | GTGTTGGTGATGGATAAAG       | CTTCATCCCTTCATTCCCTT     |
| PliSat19         | GTAGCAGTAATGCTAACCA       | TGCTACTGAGAGCTGATTG      |
| PliSat20         | CAATCAAATCCTCACAGCAATG    | CATTAGTGAGGTCAGGTACTG    |
| PliSat21         | CGATACGACCCACACGCTCA      | CCCCCTACACTTCCTGTAGT     |
| PliSat22         | CCTCTCTCCCTCACTCTGT       | GTTTGGTGTGAGGTGTGTAC     |
| PliSat23         | ATAGAGGAGTGAGGGTCAGTAT    | GTGTCTAATCCACAGTCATAC    |
| PliSat25         | AGACTGGTGCTCCATCCTC       | GAGACAGTCAGTACAGAGG      |
| PliSat27         | GCTAGACCATATGGGACCAC      | TTAAAGCTGAGCCACACGTT     |
| PliSat28         | GATGCGGAAGTACTGCCCA       | CGCATCAGACCACACAGGA      |
| PliSat29         | CCGGTGTGTTACTGTAATGTAG    | GTATCAGTAGAGACGGGGGT     |
| PliSat31         | TACAGCCCTGGAATGGCAAG      | GACTAAACAAGCCTACGCCC     |
| PliSat32         | GGATTAATCACAGTCTGAG       | TCCAGGTTTAGATACTCAG      |
| PliSat34         | GTCTGTAATGTTCTGGTGGT      | TGCTTAACTGCACAGACTGA     |
| PliSat35         | TCAGACCTACAAGGTAAGCC      | CTTGTTATTCTGTAGAGGACAC   |
| PliSat36         | GCTAAAGTCTGAGTAGACTGA     | CTTTAGCAGAGCTCAGTAAC     |
| PliSat37         | CTGCTCCAGACGACATAGGTC     | GGACAGGGTTACTGGGACAT     |
| PliSat39         | CTTGATGGTTTAGTCATAAGCGG   | CAGAACTGCTGTTGTTACCTTG   |
| PliSat41         | CAGCCCTCACCTTAACTCCA      | GGAGGTTATTTTAGTGTGGAGC   |
| PliSat44         | CCGTACTTCTGCACAATGC       | CGTGATCTTCGGTTTACGAGA    |
| PliSat45         | GCAAAGAACAGGAACAAGTGG     | AACCATGTCAGGAAGCTCGA     |
| PliSat47         | GCAGCCTTACCAAAGTCCTT      | TAGTAGTGGTGCCTACTGAG     |
| PliSat48         | CTGGCTTGATGTCCAATTATTC    | TGACTCCCGTGACCTGATAA     |
| PliSat49         | CCTGATACCACACCGAGAGA      | GTGGTGTAGTGGTCTGATC      |
| PliSat50         | GAGAGAGGAAACACTACTCAG     | GAGAAAGATCTAGAACGATAACTG |
| PliSat51         | AAGCCAAGGACACTGAACGA      | CACTGGATCTCCTGTTTACTAC   |
